# Supplementary material for: C9orf72-ALS human iPSC microglia are pro-inflammatory and toxic to co-cultured motor neurons via MMP9
Source: PubMed Central journal article supplement (PMC10517114; doi:10.1038/s41467-023-41603-0), 2023-09-22
Supplement: 41467_2023_41603_MOESM1_ESM.pdf [file 41467_2023_41603_MOESM1_ESM.pdf]

## SUPPLEMENTARY MATERIAL

### **C9orf72-ALS human iPSC microglia are pro-inflammatory and toxic to co-cultured motor neurons via MMP9**

Björn F. Vahsen<sup>1,2</sup>, Sumedha Nalluru<sup>1</sup>, Georgia R. Morgan<sup>1</sup>, Lucy Farrimond<sup>1,2</sup>, Emily Carroll<sup>1,2</sup>, Yinyan Xu<sup>1,2,3</sup>, Kaitlyn M. L. Cramb<sup>2,4</sup>, Benazir Ameen<sup>1</sup>, Jakub Scaber<sup>1,2</sup>, Antigoni Katsikoudi<sup>2,5</sup>, Ana Candalija<sup>1</sup>, Mireia Carcolé<sup>6</sup>, Ruxandra Dafinca<sup>1,2</sup>, Adrian M. Isaacs<sup>6</sup>, Richard Wade-Martins<sup>2,4</sup>, Elizabeth Gray<sup>1</sup>, Martin R. Turner<sup>1</sup>, Sally A. Cowley<sup>7,\*</sup>, Kevin Talbot<sup>1,2,\*</sup>

**\* to whom correspondence should be addressed**

#### **Author affiliations:**

1 Oxford Motor Neuron Disease Centre, Nuffield Department of Clinical Neurosciences, University of Oxford, John Radcliffe Hospital, Oxford OX3 9DU, UK

2 Kavli Institute for Nanoscience Discovery, University of Oxford, Dorothy Crowfoot Hodgkin Building, Oxford OX1 3QU, UK

3 Chinese Academy of Medical Sciences (CAMS), CAMS Oxford Institute (COI), Nuffield Department of Medicine, University of Oxford, Oxford OX3 7FZ, UK

4 Oxford Parkinson's Disease Centre, Department of Physiology, Anatomy and Genetics, University of Oxford, Dorothy Crowfoot Hodgkin Building, Oxford OX1 3QX, UK

5 Molecular Neurodegeneration Research Group, Nuffield Department of Clinical Neurosciences, University of Oxford, Dorothy Crowfoot Hodgkin Building, Oxford OX1 3QU, UK

6 UK Dementia Research Institute at UCL and Department of Neurodegenerative Disease, UCL Queen Square Institute of Neurology, London, WC1N 3BG, UK

7 James and Lillian Martin Centre for Stem Cell Research, Sir William Dunn School of Pathology, University of Oxford, Oxford OX1 3RE, UK

## Supplementary Tables:

**Supplementary Table 1: Human induced pluripotent stem cell lines used in this study.** PMID: PubMed ID. HC-2b was used to generate MNs; microglia were derived from all other lines.

| iPSC line    | abbreviation | sex    | age | mutation                                                     | PMID     |
|--------------|--------------|--------|-----|--------------------------------------------------------------|----------|
| OX3-06       | HC-1         | male   | 49  | -                                                            | 29604226 |
| SFC856-03-04 | HC-2a        | female | 78  | -                                                            | 28827786 |
| SFC840-03-03 | HC-2b        | female | 67  | -                                                            | 26905200 |
| SFC841-03-01 | HC-3         | male   | 36  | -                                                            | 27097283 |
| C9-01-07     | C9-1         | male   | 72  | <i>C9orf72</i> (~970 G <sub>4</sub> C <sub>2</sub> repeats)  | 32330447 |
| C9-02-02     | C9-2         | female | 58  | <i>C9orf72</i> (~1000 G <sub>4</sub> C <sub>2</sub> repeats) | 27097283 |
| C9-04-12     | C9-3         | male   | 39  | <i>C9orf72</i> (>500 G <sub>4</sub> C <sub>2</sub> repeats)  | 32330447 |
| 59-2         | ΔC9-2        | female | 58  | isogenic control (2 G <sub>4</sub> C <sub>2</sub> repeats)   | 32504093 |

**Supplementary Table 2: Primary antibodies used for immunofluorescent staining in this study.**

| target            | species   | dilution | catalog number             | company          |
|-------------------|-----------|----------|----------------------------|------------------|
| ChAT              | goat      | 1:100    | ab144P                     | Sigma-Aldrich    |
| cleaved caspase 3 | rabbit    | 1:400    | 9661S                      | Cell Signaling   |
| DPP4              | rabbit    | 1:200    | 67138 (Clone: D6D8K)       | Cell Signaling   |
| IBA1              | rabbit    | 1:500    | 019-19741                  | FUJIFILM Wako    |
| IBA1              | goat      | 1:500    | ab5076                     | Abcam            |
| synaptophysin     | guineapig | 1:500    | 101004                     | Synaptic Systems |
| TDP-43            | mouse     | 1:500    | 60019-2-Ig (Clone: 6H6E12) | Proteintech      |
| TMEM119           | rabbit    | 1:100    | ab185337                   | Abcam            |
| TUJ1              | mouse     | 1:1000   | 801201 (Clone: TUJ1)       | Biologend        |

**Supplementary Table 3: Primers used for RT-qPCR in this study.**

| Target gene                | Forward primer sequence   | Reverse primer sequence  |
|----------------------------|---------------------------|--------------------------|
| <i>C9orf72</i> (all)       | CCCACCTTCATAGAGTGTGTGTTG  | TTCCATTCTCTCTGTGCCTTC    |
| <i>C9orf72</i> V1 (short)  | GAAATCACACAGTGTTCCTGAAGAA | ATCTGCTTCATCCAGCTTTTATGA |
| <i>C9orf72</i> V2+3 (long) | CATGGCTCAGGATACGATCA      | GGAAGGCTTTCCTAGAGTGTCTC  |
| <i>CXCL10</i>              | GTGGCATTCAAGGAGTACCTC     | TGATGGCCTTCGATTCTGGATT   |
| <i>MMP9</i>                | GGGACGCAGACATCGTCATC      | TCGTCATCGTCGAAATGGGC     |
| <i>P2RY12</i>              | AAGAGCACTCAAGACTTTAC      | GGGTTTGAATGTATCCAGTAAG   |
| <i>TBP</i>                 | GAGAGTTCTGGGATTGTACCG     | ATCCTCATGATTACCGCAGC     |

**Supplementary Table 4: Primary antibodies used for Western blot in this study.**

| target  | species | dilution | catalog number            | company           |
|---------|---------|----------|---------------------------|-------------------|
| b-actin | mouse   | 1:5000   | AM4302 (Clone: AC-15)     | ThermoFisher      |
| C9orf72 | mouse   | 1:500    | GTX634482 (Clone: GT1553) | GeneTex           |
| C9orf72 | mouse   | 1:1000   | GTX632041 ((Clone: GT779) | GeneTex           |
| ChAT    | goat    | 1:1000   | ab144P                    | Sigma-Aldrich     |
| GAPDH   | mouse   | 1:1000   | Nb300221 (Clone: ID4)     | Novus Biologicals |
| IBA1    | rabbit  | 1:1000   | 019-19741                 | FUJIFILM Wako     |
| MMP9    | rabbit  | 1:1000   | ab76003 (Clone: EPI254)   | Abcam             |

**Supplementary Table 5:** Cytokine release into the culture supernatant measured using the Proteome Profiler Human XL Cytokine Array Kit on pooled supernatant samples from unstimulated and LPS-treated (100 ng/mL, 48 h) C9orf72-2 (C9-2) and isogenic control (IC) microglia in monoculture (pMGL) (pooled samples from n=1 line per condition with n=3 differentiations each). Data represent the mean of two technical replicates per condition. Values correspond to the signal intensity value expressed as arbitrary units. Chemokines/cytokines of particular interest and plotted in Supp. Fig. 5 are highlighted in bold.

| released factor     | IC -LPS         | IC +LPS         | C9-2 -LPS       | C9-2 +LPS       |
|---------------------|-----------------|-----------------|-----------------|-----------------|
| Adiponectin         | 750.7241        | 467.6934        | 270.3868        | 563.1321        |
| Apolipoprotein A-I  | 4561.724        | 3674.443        | 2447.887        | 3074.632        |
| Angiogenin          | 5934.224        | 5141.193        | 2150.887        | 3614.132        |
| Angiopoietin-1      | 407.7241        | 575.6934        | 245.3868        | 331.1321        |
| Angiopoietin-2      | 1576.724        | 1919.693        | 827.3868        | 1881.132        |
| BAFF                | 859.2241        | 861.6934        | 287.3868        | 786.1321        |
| BDNF                | 7607.724        | 5765.193        | 3975.387        | 8191.132        |
| C5/C5a              | 461.2241        | 651.6934        | 150.3868        | 1085.632        |
| CD14                | 3619.224        | 3824.443        | 2428.387        | 3882.132        |
| CD30                | 157.7241        | 356.1934        | 68.38679        | 61.63208        |
| CD40 ligand         | 569.2241        | 569.4434        | 0               | 459.6321        |
| Chitinase 3-like 1  | 23569.22        | 17324.19        | 15554.14        | 18127.63        |
| Complement Factor D | 2150.224        | 1786.193        | 438.8868        | 1342.382        |
| C-Reactive Protein  | 869.7241        | 981.6934        | 334.3868        | 1240.132        |
| Cripto-1            | 166.7241        | 457.1934        | 240.3868        | 360.1321        |
| Cystatin C          | 875.7241        | 450.1934        | 197.3868        | 563.1321        |
| Dkk-1               | 7836.224        | 5875.693        | 4757.887        | 3987.132        |
| DPPIV               | 11540.22        | 12829.69        | 9391.887        | 18334.13        |
| EGF                 | 293.2241        | 408.1934        | 0               | 0               |
| Emmprin             | 1326.224        | 1263.693        | 828.8868        | 1671.132        |
| ENA-78              | 19426.22        | 18231.69        | 7041.387        | 19742.63        |
| Endoglin            | 1980.724        | 1521.193        | 1011.387        | 1359.632        |
| Fas Ligand          | 456.7241        | 635.6934        | 303.8868        | 476.1321        |
| FGF basic           | 553.2241        | 841.6934        | 266.8868        | 1168.632        |
| FGF-7               | 200.2241        | 370.6934        | 18.88679        | 398.6321        |
| FGF-19              | 3574.724        | 3664.693        | 1641.887        | 3876.132        |
| Flt-3 Ligand        | 554.2241        | 516.6934        | 258.3868        | 213.1321        |
| G-CSF               | 601.7241        | 1667.693        | 146.3868        | 950.6321        |
| <b>GDF-15</b>       | <b>733.2241</b> | <b>864.1934</b> | <b>3364.887</b> | <b>4368.632</b> |
| GM-CSF              | 725.2241        | 1503.693        | 350.8868        | 1212.132        |
| GRO $\alpha$        | 9068.474        | 8211.693        | 5615.887        | 10101.13        |
| Growth Hormone      | 165.2241        | 116.1934        | 0               | 6.632075        |
| HGF                 | 1022.224        | 1235.693        | 487.3868        | 1213.632        |

|                               |                 |                 |                 |                 |
|-------------------------------|-----------------|-----------------|-----------------|-----------------|
| ICAM-1                        | 2405.224        | 1816.693        | 623.6368        | 3203.632        |
| IFN- $\gamma$                 | 869.2241        | 792.6934        | 735.8868        | 793.1321        |
| IGFBP-2                       | 12969.97        | 12778.19        | 8963.887        | 11425.13        |
| IGFBP-3                       | 4613.224        | 3095.693        | 1763.887        | 2838.132        |
| IL-1 $\alpha$                 | 543.2241        | 404.1934        | 221.3868        | 640.6321        |
| IL-1 $\beta$                  | 447.7241        | 337.1934        | 303.8868        | 462.6321        |
| IL-1ra                        | 1009.224        | 2891.693        | 970.8868        | 3724.382        |
| IL-2                          | 640.7241        | 576.6934        | 426.3868        | 983.1321        |
| IL-3                          | 87.22406        | 181.1934        | 120.3868        | 126.1321        |
| IL-4                          | 1069.724        | 644.6934        | 198.8868        | 1517.132        |
| IL-5                          | 13.22406        | 0               | 0               | 22.63208        |
| IL-6                          | 10093.72        | 16804.69        | 2480.387        | 17699.13        |
| IL-8                          | 26956.22        | 18741.69        | 18904.89        | 20429.13        |
| IL-10                         | 1911.224        | 3257.693        | 754.8868        | 3558.132        |
| IL-11                         | 1590.224        | 2075.693        | 919.3868        | 1478.632        |
| IL-12 p70                     | 497.2241        | 509.1934        | 64.88679        | 693.6321        |
| IL-13                         | 155.7241        | 296.1934        | 133.8868        | 135.1321        |
| IL-15                         | 147.2241        | 91.6934         | 103.8868        | 326.1321        |
| IL-16                         | 160.2241        | 200.1934        | 64.88679        | 499.6321        |
| IL-17A                        | 4089.724        | 5942.193        | 4234.887        | 6589.132        |
| IL-18 Bpa                     | 210.7241        | 361.1934        | 611.8868        | 722.1321        |
| IL-19                         | 480.7241        | 261.1934        | 57.88679        | 257.6321        |
| IL-22                         | 1924.724        | 1826.693        | 787.3868        | 1918.632        |
| IL-23                         | 97.22406        | 877.6934        | 194.3868        | 76.63208        |
| IL-24                         | 247.2241        | 604.9434        | 0               | 0               |
| IL-27                         | 1326.224        | 1933.693        | 791.3868        | 2053.132        |
| IL-31                         | 357.7241        | 8.693396        | 0               | 292.6321        |
| IL-32                         | 228.2241        | 280.6934        | 56.88679        | 418.6321        |
| IL-33                         | 109.2241        | 214.1934        | 122.3868        | 98.63208        |
| IL-34                         | 663.2241        | 164.6934        | 535.3868        | 554.6321        |
| <b>IP-10</b>                  | <b>3235.724</b> | <b>26647.69</b> | <b>1480.387</b> | <b>8244.632</b> |
| I-TAC                         | 287.2241        | 457.1934        | 178.3868        | 375.1321        |
| Kallikrein 3                  | 1028.224        | 1109.693        | 2354.887        | 2733.632        |
| Leptin                        | 466.2241        | 120.6934        | 20.88679        | 348.1321        |
| LIF                           | 311.7241        | 732.1934        | 0               | 618.6321        |
| Lipocalin-2                   | 950.2241        | 896.6934        | 470.8868        | 921.1321        |
| MCP-1                         | 14549.72        | 14633.19        | 12557.39        | 13890.13        |
| MCP-3                         | 785.7241        | 16825.69        | 496.8868        | 14583.13        |
| M-CSF                         | 776.7241        | 1140.693        | 600.8868        | 1251.632        |
| MIF                           | 5031.724        | 4591.193        | 3925.387        | 4684.132        |
| MIG                           | 314.7241        | 535.6934        | 241.3868        | 437.6321        |
| MIP-1 $\alpha$ /MIP-1 $\beta$ | 1124.724        | 9578.193        | 800.3868        | 13301.38        |
| MIP-3 $\alpha$                | 1445.974        | 15403.69        | 888.8868        | 19439.13        |
| MIP-3 $\beta$                 | 268.7241        | 0               | 579.3868        | 758.1321        |
| <b>MMP-9</b>                  | <b>17489.72</b> | <b>21324.69</b> | <b>25124.39</b> | <b>31134.63</b> |
| Myeloperoxidase               | 780.2241        | 627.1934        | 149.8868        | 0               |
| Osteopontin                   | 14854.72        | 15208.69        | 10418.89        | 15807.13        |
| PDGF-AA                       | 862.7241        | 1376.193        | 485.3868        | 978.6321        |
| PDGF-AB/BB                    | 63.72406        | 59.6934         | 0               | 122.6321        |
| Pentraxin 3                   | 5895.724        | 9566.193        | 4990.387        | 6521.132        |
| PF4                           | 313.2241        | 269.1934        | 77.38679        | 0               |
| RAGE                          | 229.2241        | 373.6934        | 283.3868        | 243.6321        |
| RANTES                        | 340.7241        | 2265.193        | 325.8868        | 2448.632        |
| RBP-4                         | 485.7241        | 236.1934        | 396.3868        | 667.6321        |
| Relaxin-2                     | 257.7241        | 79.6934         | 94.88679        | 820.1321        |
| Resistin                      | 1847.224        | 13868.94        | 352.8868        | 5323.632        |
| SDF-1 $\alpha$                | 4270.224        | 4503.193        | 3442.887        | 6421.132        |
| Serpin E1                     | 23322.72        | 17522.94        | 16795.89        | 19995.13        |
| SHBG                          | 58.22406        | 59.6934         | 0               | 757.6321        |
| ST2                           | 0               | 289.1934        | 83.88679        | 34.63208        |
| TARC                          | 35.72406        | 439.1934        | 199.8868        | 147.6321        |
| TFF3                          | 133.2241        | 303.1934        | 172.8868        | 0               |
| TfR                           | 632.7241        | 483.1934        | 241.3868        | 673.6321        |
| TGF- $\alpha$                 | 114.2241        | 311.6934        | 144.3868        | 261.6321        |
| Thrombospondin-1              | 2796.724        | 3121.193        | 2796.387        | 3330.132        |
| TNF- $\alpha$                 | 564.2241        | 2116.693        | 406.3868        | 1856.632        |
| uPAR                          | 4604.724        | 5744.193        | 3291.887        | 9787.632        |
| VEGF                          | 318.7241        | 1077.693        | 179.8868        | 469.6321        |
| Vitamin D BP                  | 691.2241        | 1020.193        | 750.3868        | 667.6321        |
| CD31                          | 855.2241        | 1663.693        | 1233.387        | 1366.632        |
| TIM-3                         | 5288.224        | 8376.193        | 7749.387        | 8258.882        |
| VCAM-1                        | 2486.224        | 5206.193        | 2087.887        | 3399.632        |



## Supplementary Figures and Figure Legends:

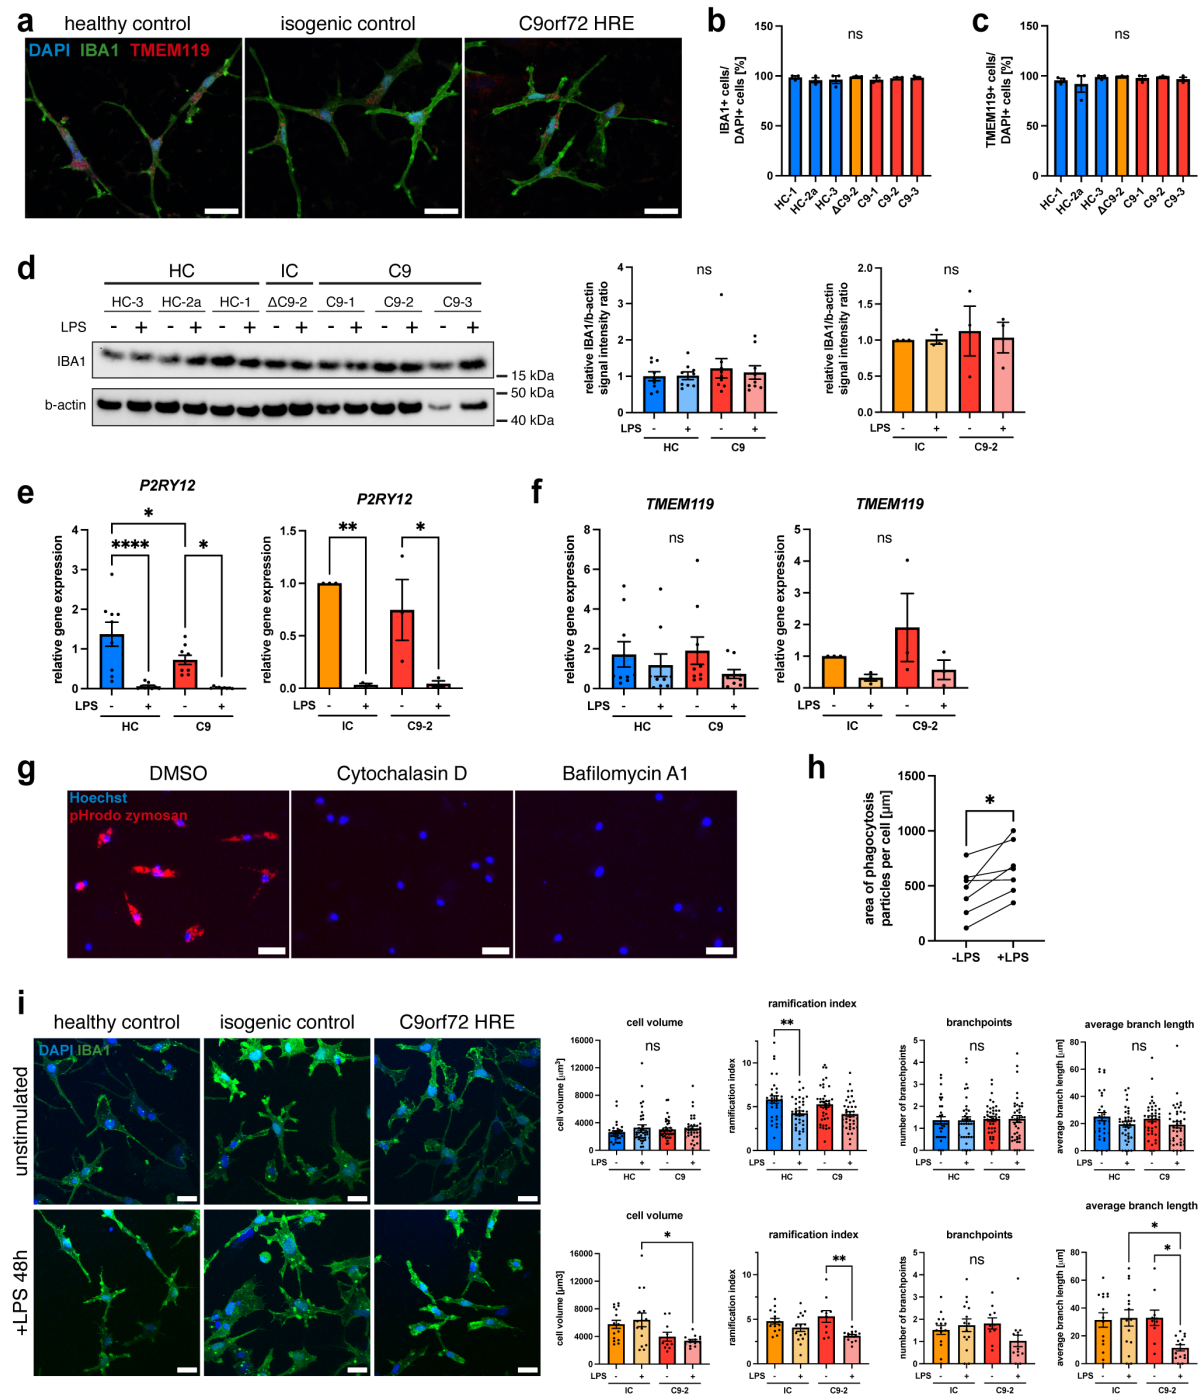

**Supp. Fig. 1: Complementary assessment of microglial marker expression and cell morphology in C9orf72 mutant microglia.** **a)** Exemplar images of healthy control (HC), isogenic (IC), and C9orf72 mutant (C9) microglia in monoculture (pMGL) showing branched microglial morphology and expression of the microglial markers IBA1 and TMEM119. Scale bars: 25  $\mu\text{m}$ . **b/c)** Quantification of the percentage of cells expressing the microglial markers IBA1 (**b**) and TMEM119 (**c**) after differentiation of microglia from each line used in this study ( $n=3$  differentiations per line). **d)** Left: Exemplar Western blot against the microglial marker IBA1 in unstimulated and LPS-treated (100 ng/mL, 48 h) HC, IC, and C9 pMGL. Right: Quantification showing equal IBA1 expression in the C9-HC pMGL ( $n=3$  lines per condition,

n=3 differentiations each) and IC-C9-2 pMGL comparisons (n=1 line per condition, n=3 differentiations each) normalized to the housekeeping gene b-actin. **e/f**) RT-qPCR for *P2RY12* and *TMEM119* expression in unstimulated and LPS-treated pMGL normalized to the housekeeping gene *TBP* shows reduced *P2RY12* expression in C9 pMGL versus controls, while *TMEM119* expression is equal (n=3 lines per condition in the C9-HC pMGL comparison; n=1 line per condition in IC-C9-2 pMGL comparison; n=3 differentiations per line). **g**) Exemplar images showing phagocytic uptake of pHrodo zymosan particles in HC microglia, which is abolished by Cytochalasin D (phagocytosis blocker) and Bafilomycin A1 (blocker of lysosomal degradation). Scale bars: 50  $\mu$ m. **h**) Quantification showing phagocytic uptake of pHrodo zymosan particles in microglia differentiated from all lines in this study. 48h pre-treatment with LPS significantly increases phagocytic uptake (n=7 lines per condition, n=1 differentiation per line). **i**) Left: Exemplar images of unstimulated and LPS-treated HC, IC, and C9 pMGL. Right: Quantification of different cell morphology parameters using 3DMorph shows no differences between C9 and HC pMGL (n=3 lines per condition, n=3 differentiations each). In the IC-C9-2 pMGL comparison, cell volume and average branch length are significantly reduced in LPS-stimulated C9-2 pMGL (n=1 line per condition, n=3 differentiations each). Datapoints are single cells. Scale bars: 25  $\mu$ m. Single data points and means  $\pm$  SEM. Two-tailed paired t-test (**h**). One-way ANOVA with Tukey's post-hoc test (**b-f, i**). Source data are provided as a Source Data file.

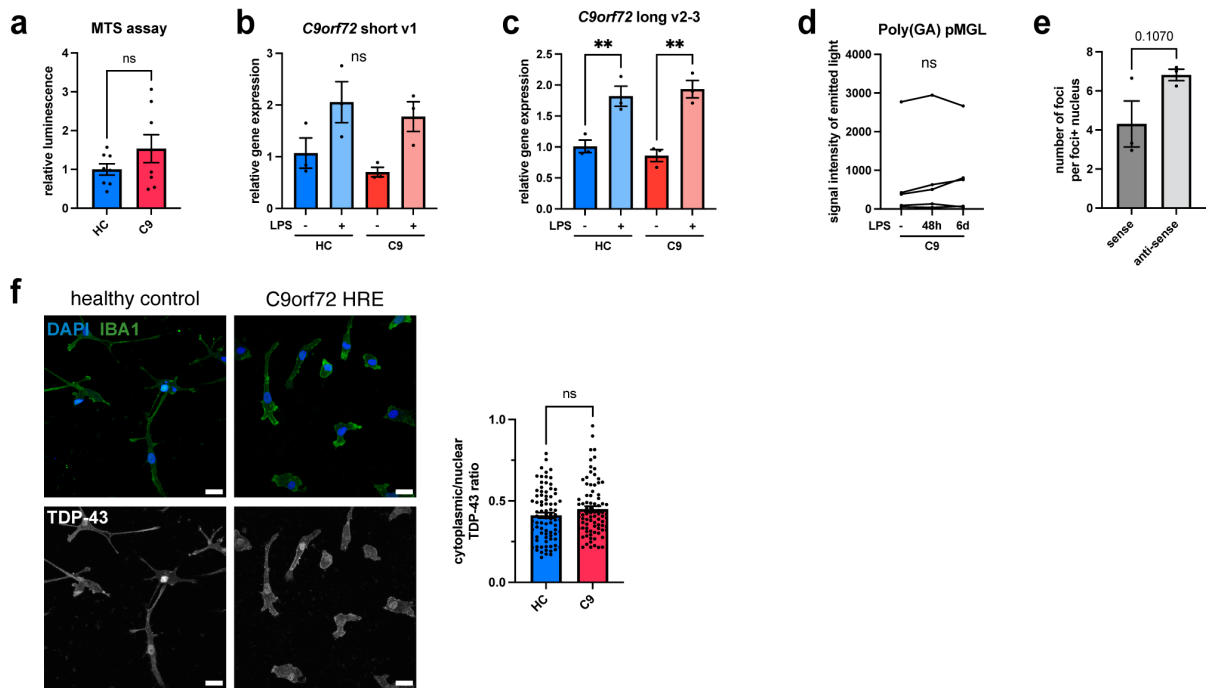

**Supp. Fig. 2: Complementary assessment of *C9orf72* variants and pathological hallmarks associated with the HRE in *C9orf72* mutant iPSC microglia.** **a)** Quantification of relative cell viability using an MTS assay showing no significant difference between *C9orf72* mutant (C9) and healthy control (HC) microglia in monoculture (pMGL) (n=2 lines per condition, n=4 differentiations each). **b)** RT-qPCR for variant 1 (v1, encoding the short isoform) and variants 2/3 (v2-3, encoding the long isoform) of *C9orf72* in unstimulated and LPS-stimulated pMGL normalized to the housekeeping gene *TBP*. Both are significantly upregulated after LPS treatment, but there is no significant difference between C9 and HC pMGL (n=3 lines per condition, n=1 differentiation per line). **d)** Analysis of Poly(GA) expression in pMGL after 48 h and 6 d of LPS treatment (100 ng/mL) by MSD ELISA shows no changes in response to treatment (n=3 lines per condition n=1-2 differentiations per line). **e)** Quantification of the number of RNA foci per foci-positive cell showing no significant difference between sense and anti-sense foci (n=3 line per condition, n=1 differentiation each). **f)** Left: Exemplar images showing TDP-43 distribution in unstimulated and LPS-stimulated HC and C9 pMGL. Right: Quantification showing no difference in the cytoplasmic/nuclear TDP-43 ratio comparing HC and C9 pMGL. Data points are individual cells from n=3 differentiations for n=3 lines per condition. Scale bars: 20  $\mu$ m. Single data points and means  $\pm$  SEM. Two-tailed unpaired t-test (**a/e/f**). One-way ANOVA with Tukey's post-hoc test (**b-d**). Source data are provided as a Source Data file.

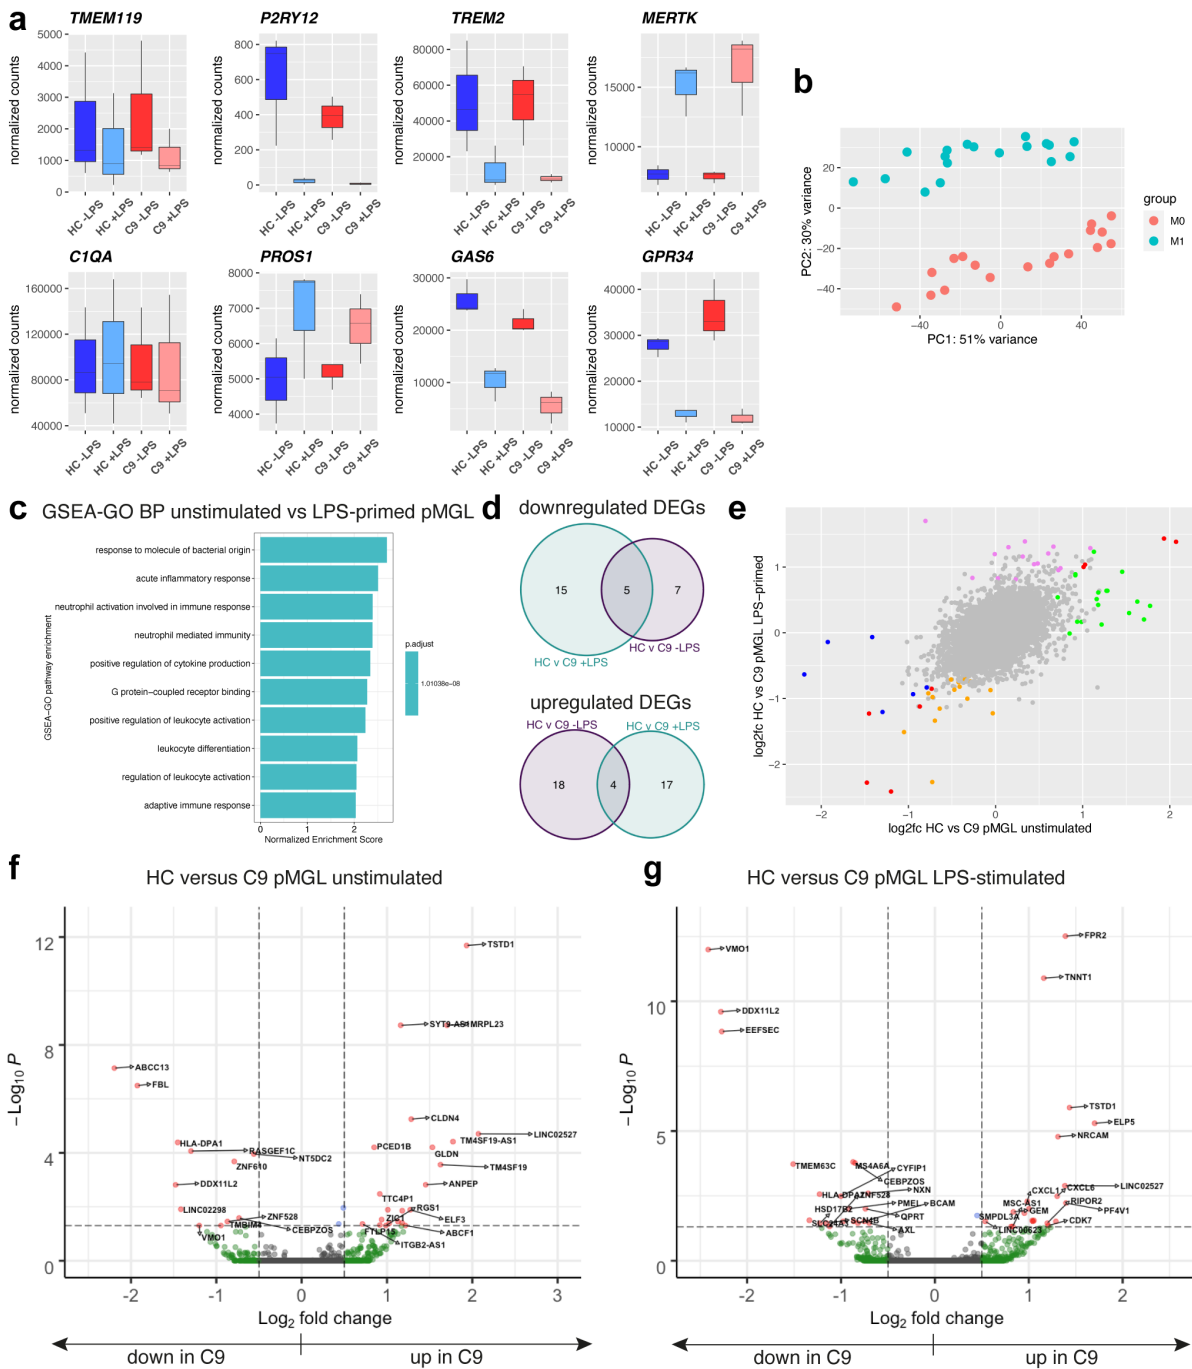

**Supp. Fig. 3: Complementary analysis of RNA sequencing of C9orf72 mutant iPSC microglia.** **a)** Box plots of normalized counts from RNA seq analysis confirming the expression of the microglial markers *TMEM119*, *P2RY12*, *TREM2*, *MERTK*, *C1QA*, *PROS1*, *GAS6*, and *GPR34* in unstimulated and LPS-treated (100 ng/mL, 48 h) healthy control (HC) and C9orf72 mutant (C9) microglia in monoculture (pMGL) (n=3 lines per condition). **b)** PCA plot based on the top 500 most variable genes with biggest variance in unstimulated versus LPS-treated pMGL (n=3 lines per condition and genotype, n=3 differentiations each). **c)** Bar plot confirming enrichment of immune cell activation pathways in LPS-treated pMGL. x-axis showing normalized enrichment score (NES) based on gene set enrichment analysis (GSEA) using the whole transcriptome ranked by  $\log_2fc$  (n=3 lines per condition and genotype, n=3 differentiations each). The Benjamini-Hochberg corrected p-values for pathway enrichment for each term is indicated by the color of the bars. **d)** Venn diagrams showing overlap of

downregulated and upregulated DEGs in unstimulated and LPS-primed C9 versus HC pMGL (n=3 lines per condition). **e)** Scatter plot showing  $\log_2fc$  in unstimulated and LPS-primed C9 versus HC pMGL (n=3 lines per condition, positive = enriched in C9 pMGL). DEGs are highlighted in different colors – red: DEGs overlapping between unstimulated and LPS-stimulated C9 pMGL compared with HC pMGL ; blue: DEGs downregulated in unstimulated C9 pMGL; green: DEGs upregulated in unstimulated C9 pMGL; orange: DEGs downregulated in LPS-stimulated C9 pMGL; violet: DEGs upregulated in LPS-stimulated C9 pMGL. **f/g)** Volcano plot showing DEGs in unstimulated (**f**) and LPS-stimulated (**g**) C9 pMGL vs HC (n=3 lines per condition).

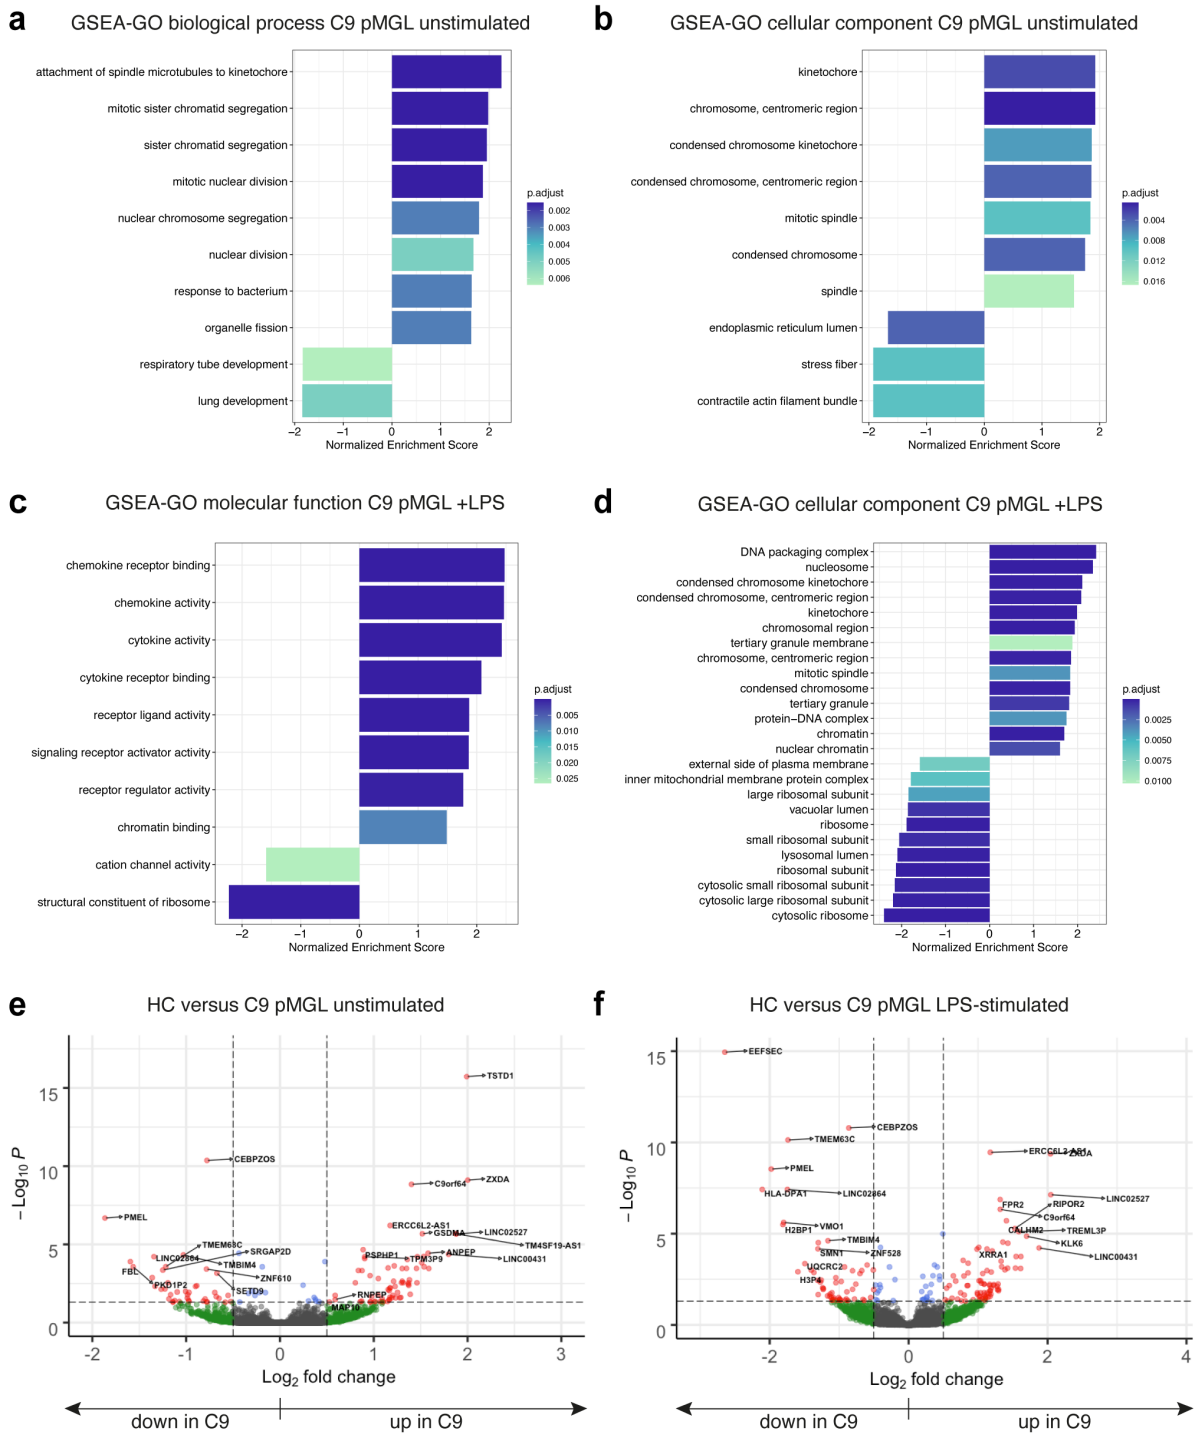

**Supp. Fig. 4: Complementary analysis of RNA sequencing of C9orf72 mutant iPSC microglia. a/b)** Bar plots showing top 10 significantly different GO biological process (a) and cellular component (b) terms for unstimulated C9 pMGL (n=3 lines per condition) versus HC pMGL based on gene set enrichment analysis (GSEA) using the whole transcriptome ranked by  $\log_2fc$ . x-axis showing normalized enrichment score (NES). The Benjamini-Hochberg corrected p-values for pathway enrichment for each term is indicated by the color of the bars. **c/d)** Bar plots showing top 10 significantly different GO molecular function (c) and top 25 cellular component (d) terms for LPS-stimulated C9 pMGL (n=3 lines per condition) versus HC pMGL based on gene set enrichment analysis (GSEA) using the whole transcriptome ranked by  $\log_2fc$ . x-axis showing normalized enrichment score (NES). The Benjamini-

Hochberg corrected p-values for pathway enrichment for each term is indicated by the color of the bars. **e/f**) Volcano plot showing DEGs in unstimulated (**e**) and LPS-stimulated (**f**) C9 vs HC pMGL with n=3 different differentiations for each line (n=3) used as different datapoints.

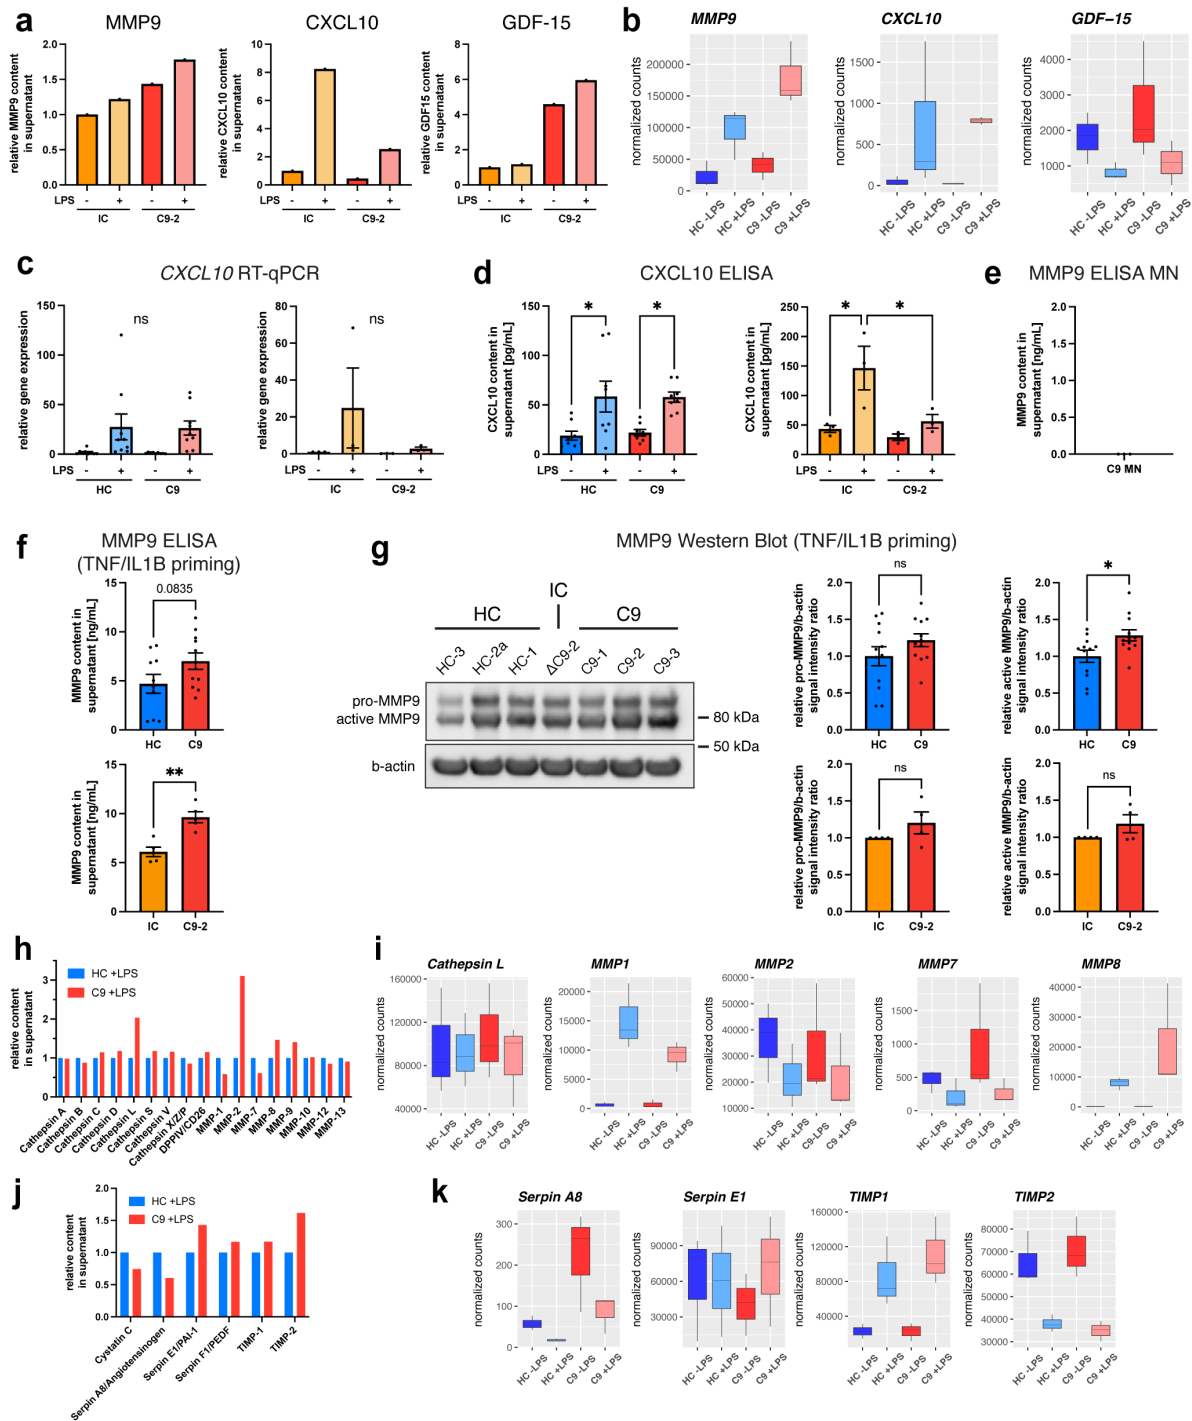

**Supp. Fig. 5: Complementary analysis of the cytokine expression and supernatant profile in C9orf72 mutant iPSC microglia.** **a)** Relative fold change in supernatant content for MMP9, CXCL10, and GDF-15 using a Cytokine Array on unstimulated and LPS-treated (100 ng/mL, 48 h) C9orf72-2 mutant (C9-2) and isogenic (IC) microglia in monoculture (pMGL) (pooled from n=3 differentiations each). Full list of chemokines/cytokines provided in Supplementary Table 5. **b)** Box plots of normalized counts from RNA seq analysis for *MMP9*, *CXCL10*, and *GDF-15* (n=3 lines per condition). **c)** RT-qPCR for *CXCL10* normalized to *TBP* as housekeeping gene (n=3 lines per condition for C9-healthy control (HC) pMGL and n=1 line per condition for IC-C9-2 pMGL comparison, n=3 differentiations each). **d)** ELISA for CXCL10 release into the culture supernatant (n=3 lines per condition for C9-HC pMGL and n=1 line per condition for IC-C9-2 pMGL comparison, n=3 differentiations each). **e)** ELISA



quantification showing no MMP9 release from C9 MNs (n=3 lines, n=1 differentiation each). **f)** ELISA quantification of MMP9 in supernatants after 48h-stimulation with TNF (50 ng/mL) and IL1B (20 ng/mL) (n=3 lines per condition, n=3-5 differentiations each for C9-HC comparison; n=1 line per condition, n=5 differentiations each for IC-C9-2 pMGL comparison). **g)** Left: Exemplar Western blot against pro- and active MMP9 normalized to the housekeeping gene b-actin after 48h-stimulation with TNF/IL1B. Right: Quantification showing significantly increased active MMP9 in C9 vs HC pMGL (n=3 lines per condition for C9-HC comparison, n=1 line for the IC-C9-2 comparison, n=4 differentiations each). **h)** Relative fold change for selected targets using a Protease Array on pMGL supernatant samples (pooled from n=3 lines per condition with n=2-3 differentiations each). **i)** Box plots of normalized counts from pMGL RNA-seq analysis for *CTSL*, *MMP1*, *MMP2*, *MMP7*, and *MMP8* (n=3 lines per condition). **j)** Relative fold change for selected targets using a Protease Inhibitor Array on pMGL supernatant samples (pooled from n=3 lines per condition with n=2-3 differentiations each). **k)** Box plots of normalized counts from pMGL RNA-seq analysis for *AGT* (Serpin A8), *SERPINE1*, *TIMP1*, and (n=3 lines per condition). Single data points and means  $\pm$  SEM or box plots. One-way ANOVA with Tukey's post-hoc test (**c/d**). Two-tailed unpaired t-test (**f/g**). Source data are provided as a Source Data file.

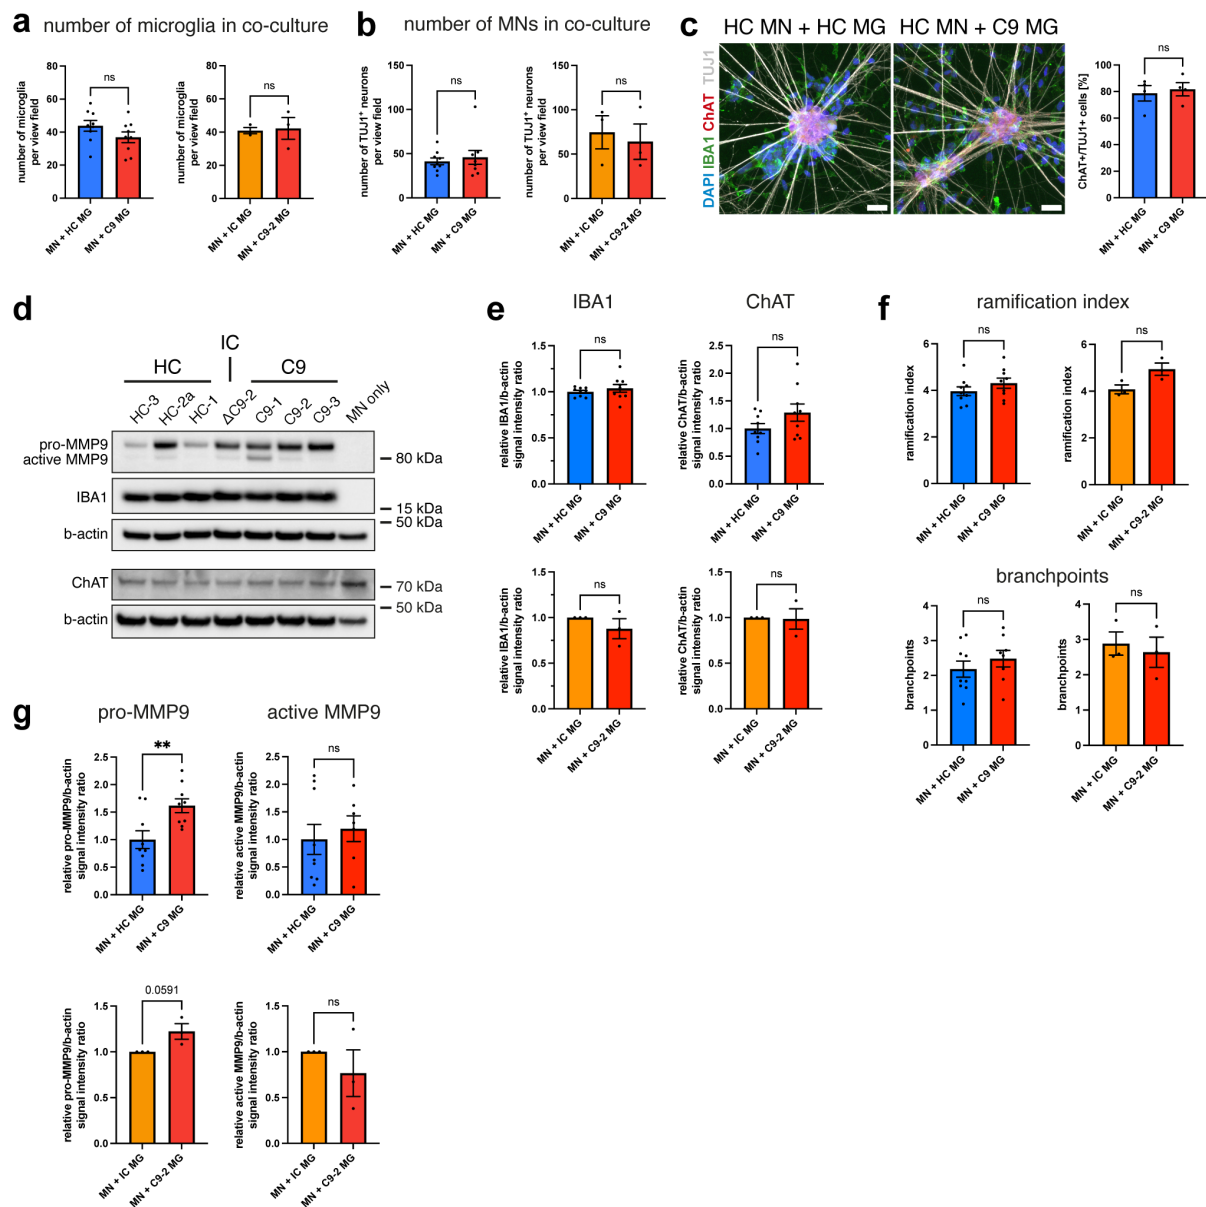

**Supp. Fig. 6: Complementary analysis of unstimulated co-cultures of C9orf72 mutant and healthy iPSC microglia and healthy iPSC motor neurons.** **a/b)** Quantification shows equal numbers of unstimulated healthy control (HC), isogenic control (IC), and C9orf72 mutant (C9) microglia (MG, **a**) in co-culture with healthy motor neurons (MNs, **b**) ( $n=3$  microglial lines (C9-HC comparison) and  $n=1$  line (IC-C9-2 comparison),  $n=3$  differentiations each). **c)** Left: exemplar images showing expression of the MN marker ChAT in MNs in co-culture with HC and C9 MG. Right: Quantification showing equal ChAT expression in MNs in co-culture with HC and C9 MG ( $n=3$  microglial lines,  $n=1-2$  differentiations). Scale bars: 25  $\mu\text{m}$ . **d)** Exemplar Western blot against IBA1, ChAT, and MMP9 in co-cultures of HC MNs with unstimulated HC, IC, and C9 microglia. **e)** Quantification of Western blot (in **d**) normalized to the housekeeping gene b-actin shows equal expression of the microglia marker IBA1 and the MN marker ChAT in co-cultures with unstimulated C9 and control MG ( $n=3$  microglial lines for C9 and HC MG and  $n=1$  microglial line for IC-C9-2 comparison,  $n=3$  differentiations each). **f)** Quantification of microglial morphology using 3DMorph shows similar ramification index and number of branch points in C9 and control MG in co-culture with healthy MNs ( $n=3$  microglial lines (C9-HC comparison) and  $n=1$  microglial line (IC-C9-2 comparison),  $n=3$  differentiations). **g)** Quantification of Western blot (in **d**) normalized to the housekeeping gene

b-actin shows significantly increased pro-MMP9 in the C9-HC comparison and a numeric increase in the IC-C9-2 comparison, while active MMP9 levels are unchanged (n=3 microglial lines for C9 and HC MG and n=1 microglial line for C9-2-IC comparison, n=3 differentiations each). Single data points and means  $\pm$  SEM. Two-tailed unpaired t-test (**a-c**, **e-g**). Source data are provided as a Source Data file.

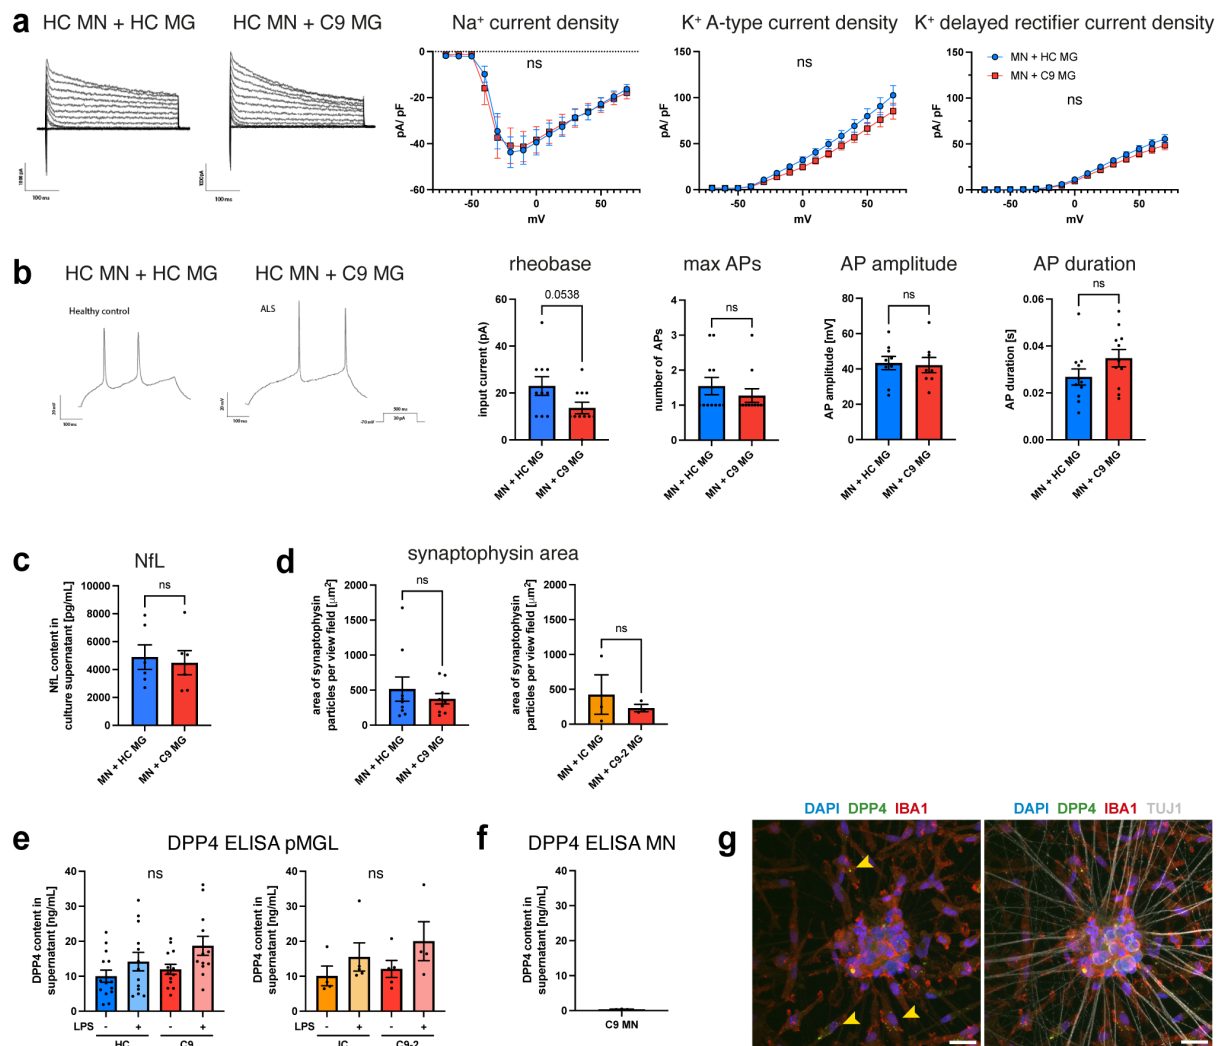

**Supp. Fig. 7: Complementary analysis of unstimulated co-cultures of C9orf72 mutant and healthy iPSC microglia and healthy iPSC motor neurons. a)** Left: Exemplar potassium and sodium currents in healthy control (HC) motor neurons (MNs) in co-culture with C9orf72 mutant (C9) and HC microglia (MG) using patch clamping. Right: Quantification shows no difference between HC MNs in co-culture with C9 and HC MG (co-cultures with n=3 microglial lines per condition with n=1 differentiations per line). **b)** Left: Exemplar induced action potentials (APs) in HC MNs in co-culture with C9 and HC MG using patch clamping. Right: Quantification of different AP parameters shows a trend to increased excitability but no statistical difference between HC MNs in co-culture with C9 and HC MG (single cells from co-cultures with n=3 microglial lines per condition with n=1 differentiations per line). **c)** Quantification of neurofilament light chain (NfL) release into the culture supernatant by MSD ELISA shows no difference between co-cultures with C9 and HC MG (co-cultures with n=3 microglial lines with n=2 differentiations each). **d)** Quantification of the area of synaptophysin particles shows no difference between co-cultures with C9 and control MG (n=3 microglial lines (C9-HC comparison) and n=1 microglial line (IC-C9-2 comparison), n=3 differentiations each). **e)** ELISA quantification shows no statistical difference in DPP4 content in culture supernatants from unstimulated and LPS-treated (100 ng/mL, 48 h) HC, IC, and C9 microglia in monoculture (pMGL) (n=3 lines per condition for C9-HC pMGL and n=1 line per condition for IC-C9-2 pMGL comparison, n=4-5 differentiations each). **f)** ELISA quantification shows DPP4 is barely released from C9 MNs in monoculture (n=3 lines, n=1 differentiation each). **g)** Exemplar immunofluorescent staining showing DPP4 expression co-localizes with IBA1-

positive cells, suggesting DPP4 is released by microglia in co-culture. Scale bars: 25  $\mu\text{m}$ . Single data points and means  $\pm$  SEM. Two-way ANOVA with Sidak's post-hoc test (**a**). Two-tailed unpaired t-test (**b-d**). One-way ANOVA with Tukey's post-hoc test (**e**). Source data are provided as a Source Data file.

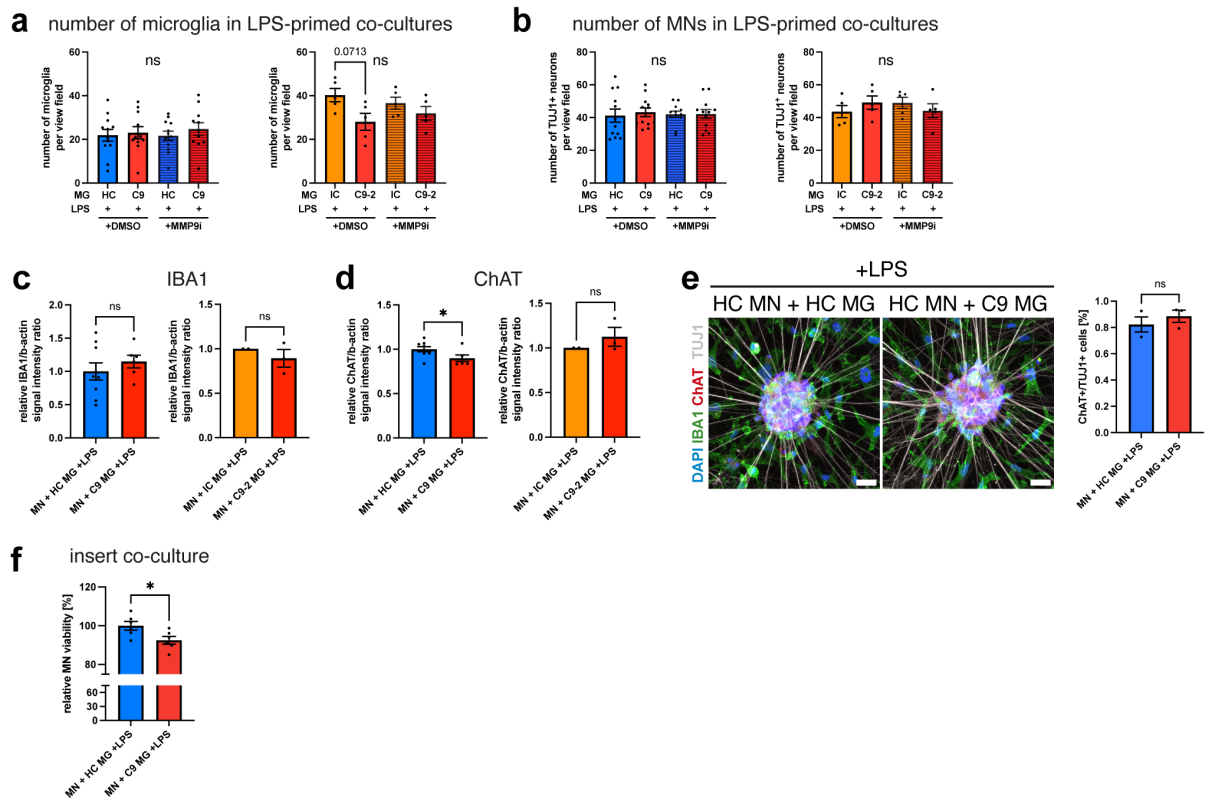

**Supp. Fig. 8: Complementary analysis of LPS-stimulated co-cultures of C9orf72 mutant and healthy iPSC microglia with healthy iPSC motor neurons. a/b)** Quantification showing equal numbers of healthy control (HC), isogenic control (IC), and C9orf72 mutant (C9) microglia (MG, **a**) in LPS-treated co-cultures with HC motor neurons (MNs, **b**) (co-cultures with n=3 microglial lines (C9-HC comparison) with n=3-4 differentiations each; n=1 microglial line (IC-C9-2 comparison) with n=5 differentiations each). **c/d)** Quantification of Western blot shown in **Fig. 5c** normalized to the housekeeping gene b-actin shows equal expression of the microglia marker IBA1 in LPS-treated co-cultures with C9 and control MG. The MN marker ChAT shows a mild but significant decrease in co-cultures with C9 compared with HC but not IC MG (co-cultures with n=2-3 microglial lines for C9 and HC MG and n=1 line for IC-C9-2 comparison, n=1-3 differentiations each). **e)** Left: exemplar images showing expression of the MN marker ChAT in MNs in LPS-treated co-cultures with HC and C9 MG. Right: Quantification showing equal ChAT expression in MNs in co-culture with HC and C9 MG (co-cultures with n=3 microglial lines, n=1 differentiation). Scale bars: 25  $\mu$ m. **f)** MTS assay showing reduced MN viability in LPS-treated transwell co-cultures with C9 MG compared with HC MG (co-cultures with n=2 microglial lines, n=3 differentiations). Single data points and means  $\pm$  SEM. One-way ANOVA with Tukey's post-hoc test (**a/b**) and two-tailed unpaired t-test (**c-f**). Source data are provided as a Source Data file.

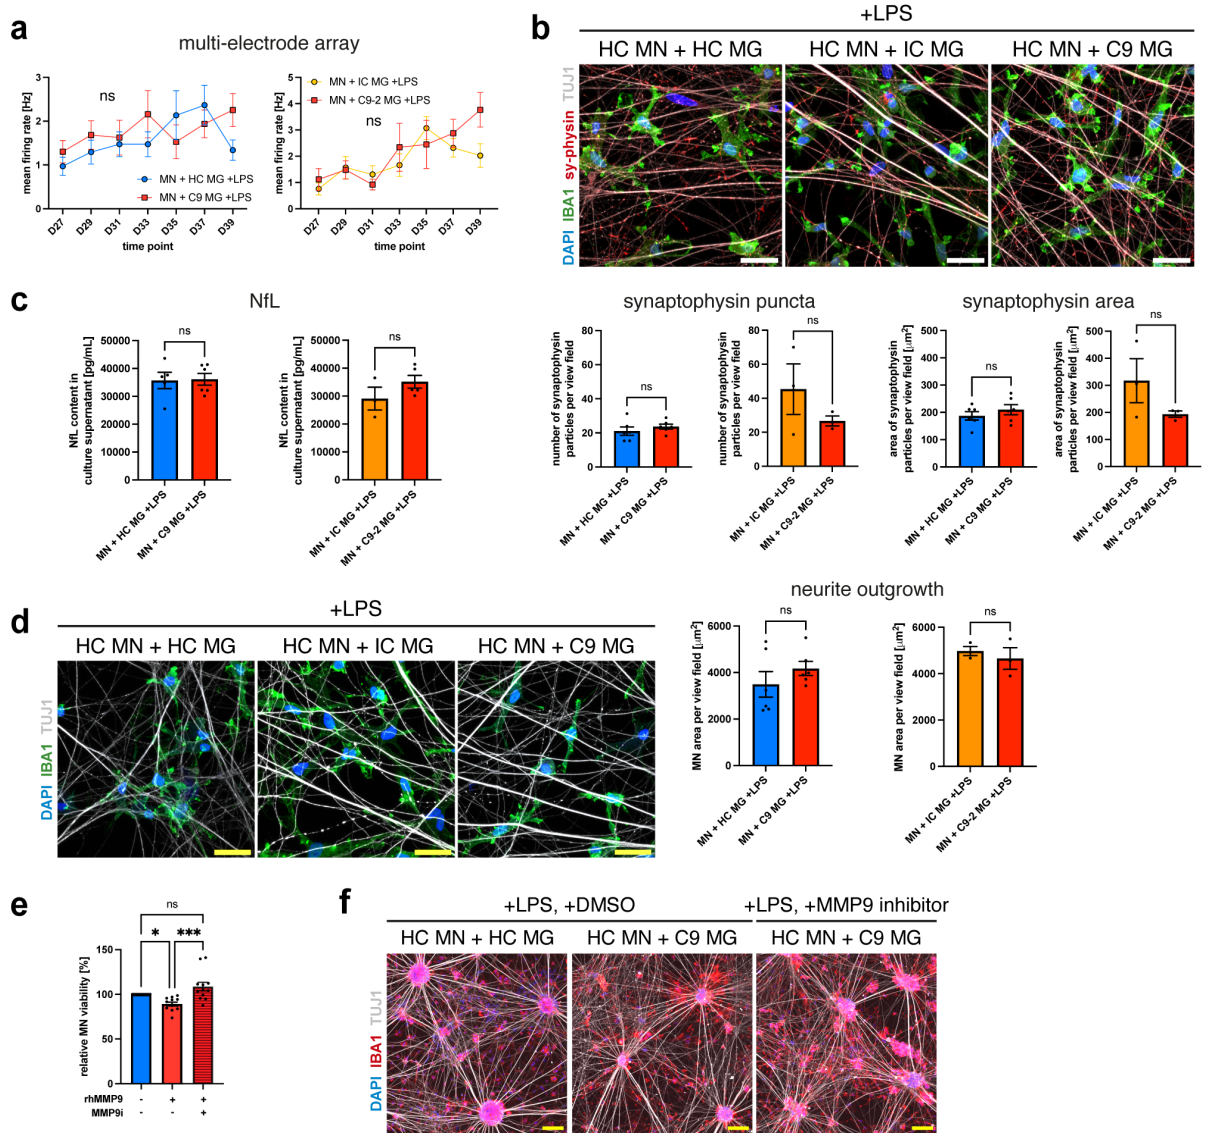

**Supp. Fig. 9: Complementary analysis of LPS-stimulated co-cultures of C9orf72 mutant iPSC microglia with healthy iPSC motor neurons.** **a)** Multi-electrode array analysis of healthy MNs in LPS-treated co-cultures with healthy control (HC), isogenic control (IC), and C9orf72 mutant (C9) microglia (MG) shows no differences in the mean firing rate ( $n=3$  wells per differentiation for co-cultures with  $n=3$  microglial lines (C9-HC comparison) and  $n=1$  microglial line (IC-C9-2 comparison),  $n=2$  differentiations each). **b)** Top: exemplar images of synaptophysin (sy-physin) staining in LPS-treated co-cultures with HC, IC, and C9 MG. Bottom: Quantification of the area and number of synaptophysin particles showing no difference between co-cultures with C9 and control MG (co-cultures with  $n=3$  microglial lines (C9-HC comparison) and  $n=1$  microglial line (IC-C9-2 comparison),  $n=2-3$  differentiations each). Scale bars: 25  $\mu\text{m}$ . **c)** Quantification of neurofilament light chain (NfL) release into the culture supernatant by MSD ELISA showing no difference between co-cultures with C9 and control MG (co-cultures with  $n=2$  microglial lines (C9-HC comparison) and  $n=1$  microglial line (IC-C9-2 comparison),  $n=2-5$  differentiations each). **d)** Left: exemplar images of TUJ1-positive neurites in LPS-treated co-cultures with HC, IC, and C9 MG. Right: Quantification of neurite outgrowth showing no difference between co-cultures with C9 and control MG (co-cultures with  $n=3$  microglial lines (C9-HC comparison) and  $n=1$  microglial line (IC-C9-2 comparison),  $n=2-3$  differentiations). Scale bars: 25  $\mu\text{m}$ . **e)** MTS assay showing reduced viability of HC MNs after treatment with recombinant human MMP9 (rhMMP9, 30 ng/mL),

which is rescued by concomitant treatment with MMP9 inhibitor I (MMP9i, 3  $\mu$ M) (n=3 lines, n=4 differentiations each). **f)** Same images as in **Fig. 6c** additionally showing the IBA1 staining in co-cultures of HC MNs with HC and C9 MG after pro-longed LPS treatment. Scale bars: 100  $\mu$ m. Single data points and means  $\pm$  SEM. Two-way ANOVA with Tukey's post-hoc test (**a**), two-tailed unpaired t-test (**b-d**), and one-way ANOVA with Tukey's post-hoc test (**e**). Source data are provided as a Source Data file.
